# Supplementary material
Source: bioRxiv or medRxiv preprint supplement (https://medrxiv.org/content/medrxiv/early/2021/05/20/2021.05.19.21257433.1/DC1/embed/media-1.pdf)
Supplement: Supplementary file [file media-1.pdf]

## Supplementary Data 1

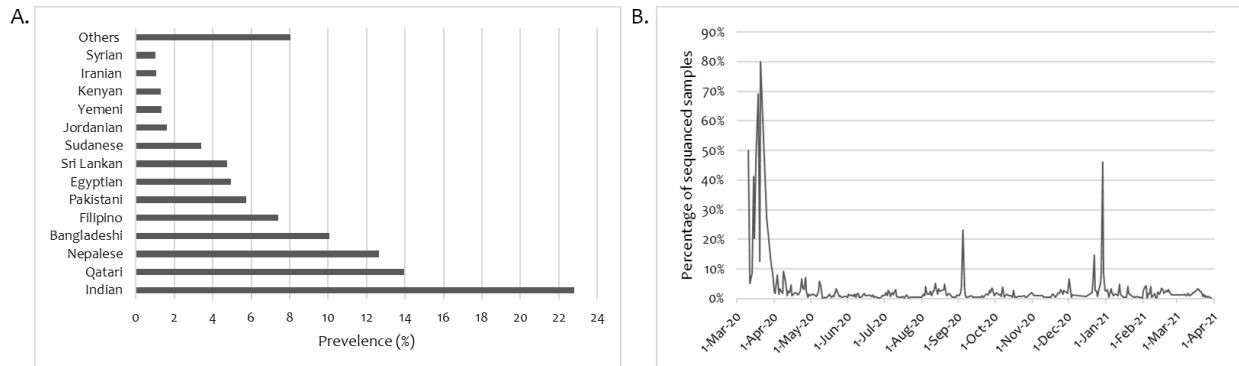

**Supplementary Figure.1. Nationalities and the frequency of sequenced samples in the studies cohort.**

**(A)** Nationalities observed at least at 1% prevalence. Others (<1%) includes: Algerian, American, Argentinean, Australian, Bahraini, Brazilian, British, Cameroonian, Canadian, Chinese, Cuban, Cypriot, Djiboutian, Dominican, Emirati, Eritrean, Ethiopian, French, Gambian, German, Ghanaian, Indonesian, Irish, Italian, Lebanese, Malaysian, Malian, Moroccan, Myanmar, Nepalese, Nigerian, Omani, Palestinian, Portuguese, Romanian, Russian, Saudi, Serbian, Somali, South African, South Korean, Spanish, Sudanese, Swiss, Tajik, Thai, Tunisian, Turkish, Ugandan, and Ukrainian. **(B)** Percentage of sequenced samples in reference to the daily COVID19 positive cases in Qatar.

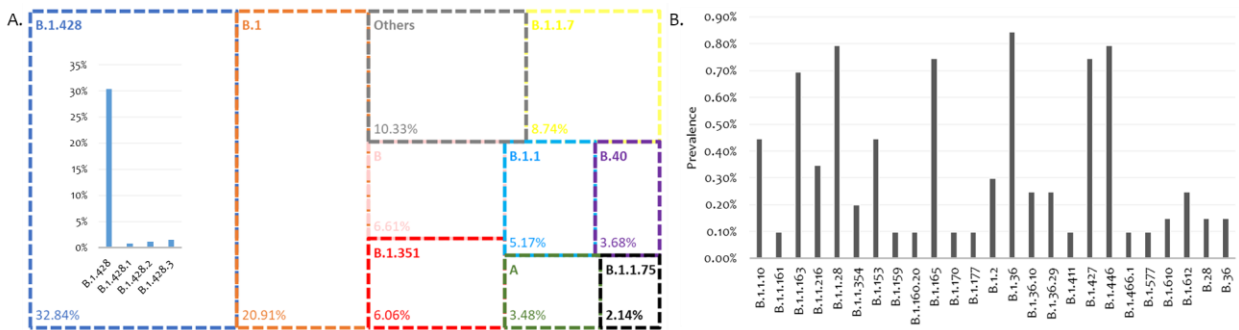

**Supplementary Figure.2. Lineages detected in Qatar's sequenced cohort. (A)** Highly prevalent lineages (>1%) and **(B)** Low prevalent lineages (<1% and in at least two sequences). Nomenclature is based on Pangolin tool.

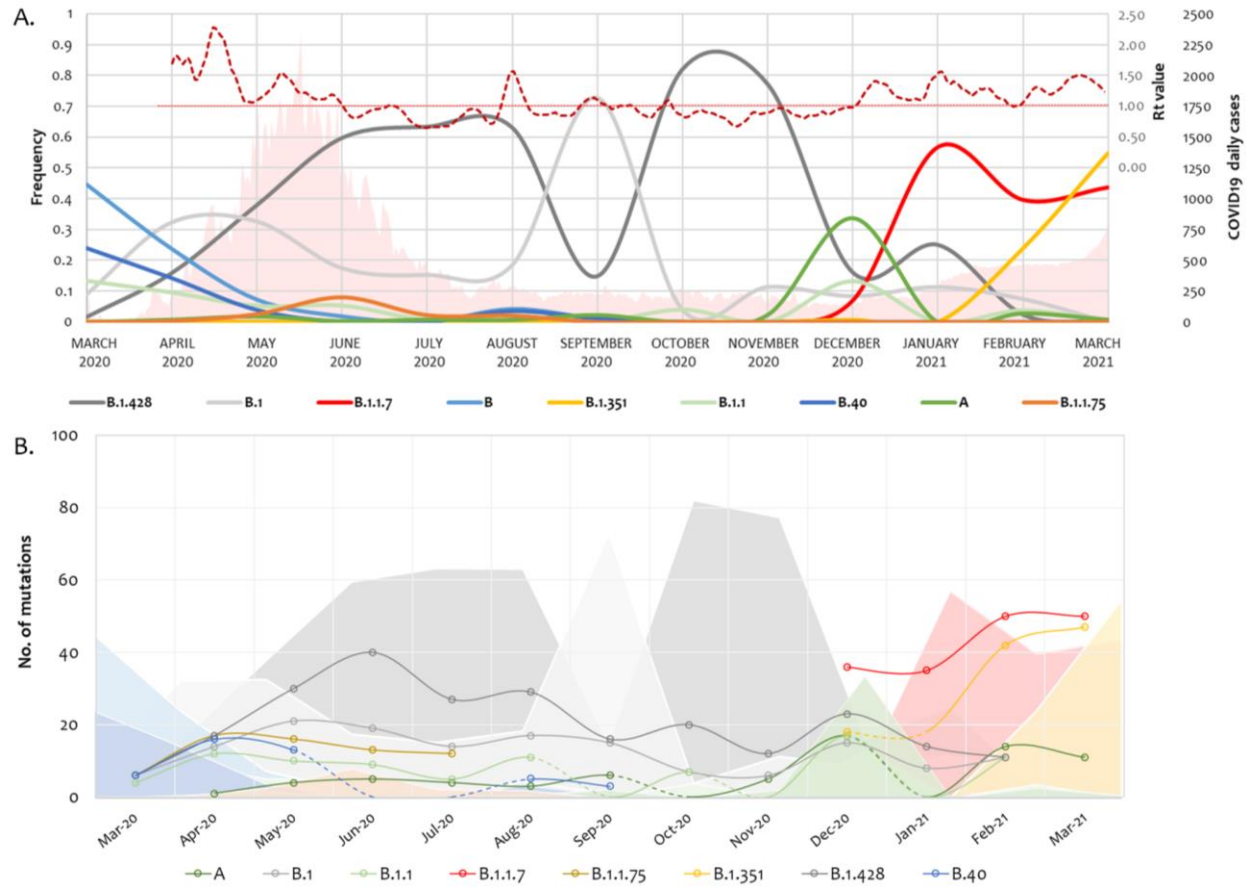

**Supplementary Figure.3. SARS-COV-2 lineages evolution over the one-year study period (March 2020-March 2021).** **(A)** Frequency of the highly prevalent lineages across the one year period in reference to COVID19 daily positive cases (area in light pink) and the Effective Reproduction Number ( $R_t$ , in dotted deep red line). The light red line highlights an  $R_t$  value of 1. **(B)** Accumulation of non-synonymous mutations in the genomes of major SARS-CoV-2 lineages.
